# Supplementary material for: The shield of self-compassion: A buffer against disordered eating risk from physical appearance perfectionism
Source: PubMed Central journal article supplement (PMC6957174; doi:10.1371/journal.pone.0227564), 2020-01-13
Supplement: pone.0227564.s001.pdf [file pone.0227564.s001.pdf]

**S1 Table: Summary of descriptive statistics for untransformed and transformed values.**  
This includes mean (M), standard deviation (SD) and range (N=421).

| Variable                               | Raw values |           |              | Transformed values |           |              |
|----------------------------------------|------------|-----------|--------------|--------------------|-----------|--------------|
|                                        | <i>M</i>   | <i>SD</i> | <i>Range</i> | <i>M</i>           | <i>SD</i> | <i>Range</i> |
| 1. Self-oriented perfectionism (MPS)   | 26.80      | 6.31      | 30           | 3.73               | 1.06      | 4.57         |
| 2. Disordered Eating Symptoms (EAT-26) | 11.45      | 11.74     | 54           | 2.93               | 1.70      | 7.35         |
| 3. Body Mass Index (BMI)               | 22.24      | 3.20      | 18.33        | 1.34               | .06       | .33          |

| Variable                              | $R^2$ | $\Delta R^2$ | $B$                        | SE(B) | $\beta$ | $p$   |
|---------------------------------------|-------|--------------|----------------------------|-------|---------|-------|
| Step 1                                | .34   | .34          |                            |       |         |       |
| Constant                              |       |              | -12.65<br>(-16.36, -9.17)  | 1.86  |         | <.001 |
| Worries about appearance imperfection |       |              | 5.44<br>(4.38, 6.48)       | .49   | .50     | <.001 |
| Striving for appearance perfection    |       |              | 1.94<br>(.87, 3.00)        | .52   | .17     | .001  |
| Step 2                                | .36   | .02          |                            |       |         |       |
| Constant                              |       |              | -17.94<br>(-22.92, -13.55) | 2.35  |         | <.001 |
| Worries about appearance imperfection |       |              | 5.17<br>(4.12, 6.20)       | .50   | .47     | <.001 |
| Striving for appearance perfection    |       |              | 1.52<br>(.44, 2.58)        | .52   | .13     | .010  |
| Socially-prescribed perfectionism     |       |              | .08<br>(-.08, .24)         | .08   | .04     | .320  |
| Self-oriented perfectionism           |       |              | .23<br>(.07, .39)          | .08   | .12     | .007  |

Note:  $R^2$  = r\_squared.  $\Delta R^2$  = change in  $R^2$ .  $B$  = unstandardized regression coefficient. SE(B) = standard error  $B$ .  $\beta$  = standardised regression coefficient.

| Variable                              | $R^2$ | $\Delta R^2$ | $B$                        | SE(B) | $\beta$ | $p$   |
|---------------------------------------|-------|--------------|----------------------------|-------|---------|-------|
| Step 1                                | .23   | .23          |                            |       |         |       |
| Constant                              |       |              | 2.68<br>(1.01, .52)        | .94   |         | .004  |
| DASS21                                |       |              | .43<br>(.33, .52)          | .04   | .48     | <.001 |
| Step 2                                | .26   | .03          |                            |       |         |       |
| Constant                              |       |              | -5.54<br>(-9.46, -1.66)    | 2.21  |         | .013  |
| DASS21                                |       |              | .37<br>(.28, .46)          | .04   | .42     | <.001 |
| Socially prescribed perfectionism     |       |              | .10<br>(-.07, .28)         | .09   | .06     | .229  |
| Self-oriented perfectionism           |       |              | .28<br>(.12, .45)          | .09   | .15     | .002  |
| Step 3                                | .41   | .15          |                            |       |         |       |
| Constant                              |       |              | -16.77<br>(-21.57, -12.52) | 2.29  |         | <.001 |
| DASS21                                |       |              | .22<br>(.13, .31)          | .04   | .25     | <.001 |
| Socially prescribed perfectionism     |       |              | -.01<br>(-.18, .14)        | .08   | -.01    | .855  |
| Self-oriented perfectionism           |       |              | .19<br>(.04, .35)          | .08   | .10     | .020  |
| Worries about appearance imperfection |       |              | 3.99<br>(3.01, 4.95)       | .53   | .36     | <.001 |
| Striving for appearance perfection    |       |              | 1.76<br>(.74, 2.87)        | .51   | .15     | .001  |

Note:  $R^2$  = r\_squared.  $\Delta R^2$  = change in  $R^2$ .  $B$  = unstandardized regression coefficient. SE(B) = standard error  $B$ .  $\beta$  = standardised regression coefficient.
